# Supplementary material for: A new alternative assay for sensitive analysis of ethylenethiourea and propylenethiourea in fruit samples after their separation
Source: Royal Society of Chemistry journal article supplement (doi:10.1039/d0ay01001d), 2020-01-01
Supplement: d0ay01001d1.pdf [file d0ay01001d1.pdf]

## Supporting information

### **A new alternative assay for sensitive analysis of ethylenethiourea and propylenethiourea in fruit samples after their separation**

Siriwan Nantaphol<sup>a</sup>, Chochanon Moonla<sup>b</sup>, Siriwipa Promvichai<sup>c</sup>, Tanin Tangkuaram<sup>b</sup>, Orawon Chailapakul<sup>a</sup>, and Weena Siangproh<sup>c\*</sup>

<sup>a</sup> Electrochemical and Optical Spectroscopy Center of Excellence (EOSCE), Department of Chemistry, Faculty of Science, Chulalongkorn University, 254 Phayathai Road, Pathumwan, Bangkok, 10330, Thailand

<sup>b</sup> Department of Chemistry, Faculty of Science, Maejo University, Sansai, Chiang Mai 50290, Thailand

<sup>c</sup> Department of Chemistry, Faculty of Science, Srinakharinwirot University, Sukhumvit 23, Wattana, Bangkok 10110, Thailand

\*Corresponding author: Tel: +662 640 5000 ext. 18208; Fax: +66 2 259 2097 E-mail [weenasi@hotmail.com](mailto:weenasi@hotmail.com) (W. Siangproh)

## 1. Hydrodynamic Voltammetry

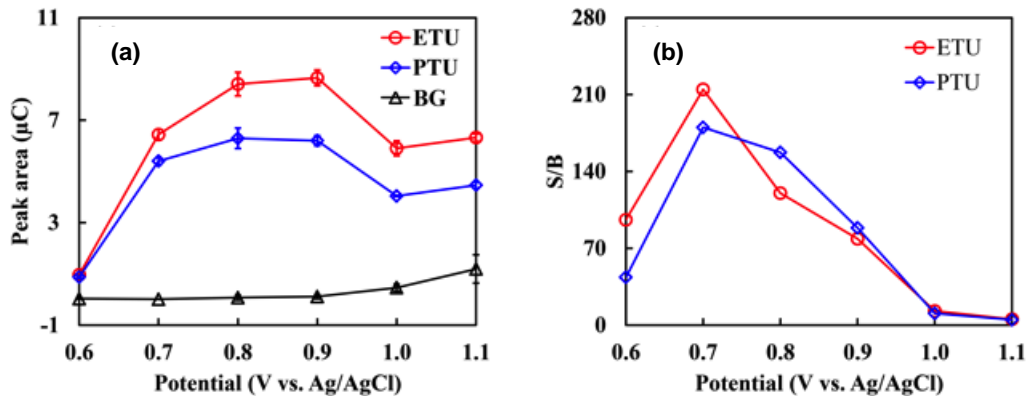

**Fig. S1** (a) Hydrodynamic voltammograms in the presence and absence of a standard mixture containing  $10 \mu\text{g mL}^{-1}$  of each target analyte (ETU and PTU) in phosphate buffer solution (0.05 M, pH 4): MeOH (90:10) at CoPc-SPCE. (b) Hydrodynamic voltammogram of signal-to-background ratios extracted from the data shown in part a.

## 2. Application to real samples

**Table S1** Determination of ETU and PTU levels in different samples (n=3) by traditional UHPLC-UV method and a new alternative UHPLC-ECD using CoPc-SPCE

| Sample | Spiked level<br>( $\mu\text{g mL}^{-1}$ ) | Analyte | Amount founded<br>( $\mu\text{g mL}^{-1}$ ) ( $\bar{x}\pm\text{SD}$ ) |                 | Recovery (%)  |              |
|--------|-------------------------------------------|---------|-----------------------------------------------------------------------|-----------------|---------------|--------------|
|        |                                           |         | UHPLC-<br>ECD                                                         | UHPLC-UV        | UHPLC-<br>ECD | UHPLC-<br>UV |
| Apple  | 1.0                                       | ETU     | $1.06 \pm 0.04$                                                       | $1.00 \pm 0.02$ | 105.9         | 100.4        |
|        | 2.5                                       |         | $2.50 \pm 0.05$                                                       | $2.40 \pm 0.05$ | 100.1         | 96.1         |
|        | 5.0                                       |         | $4.67 \pm 0.08$                                                       | $4.75 \pm 0.01$ | 93.3          | 95.0         |
|        | 1.0                                       | PTU     | $1.08 \pm 0.01$                                                       | $0.97 \pm 0.01$ | 107.9         | 97.44        |
|        | 2.5                                       |         | $2.54 \pm 0.02$                                                       | $2.59 \pm 0.01$ | 101.6         | 103.6        |
|        | 5.0                                       |         | $4.71 \pm 0.04$                                                       | $4.89 \pm 0.01$ | 94.3          | 97.8         |
| Grape  | 1.0                                       | ETU     | $1.04 \pm 0.03$                                                       | $1.03 \pm 0.02$ | 104.1         | 103.5        |
|        | 2.5                                       |         | $2.36 \pm 0.18$                                                       | $2.45 \pm 0.08$ | 94.4          | 98.1         |
|        | 5.0                                       |         | $4.84 \pm 0.19$                                                       | $4.69 \pm 0.03$ | 96.8          | 93.7         |
|        | 1.0                                       | PTU     | $1.02 \pm 0.01$                                                       | $0.99 \pm 0.01$ | 102.0         | 99.9         |
|        | 2.5                                       |         | $2.35 \pm 0.04$                                                       | $2.60 \pm 0.01$ | 93.9          | 104.0        |
|        | 5.0                                       |         | $4.76 \pm 0.07$                                                       | $4.90 \pm 0.02$ | 95.1          | 97.9         |
| Nut    | 1.0                                       | ETU     | $0.85 \pm 0.02$                                                       | $1.04 \pm 0.03$ | 85.6          | 104.3        |
|        | 2.5                                       |         | $2.65 \pm 0.07$                                                       | $2.36 \pm 0.01$ | 106.1         | 95.1         |
|        | 5.0                                       |         | $4.82 \pm 0.08$                                                       | $4.92 \pm 0.02$ | 96.5          | 98.4         |
|        | 1.0                                       | PTU     | $0.97 \pm 0.03$                                                       | $0.91 \pm 0.01$ | 96.6          | 91.5         |
|        | 2.5                                       |         | $2.35 \pm 0.08$                                                       | $2.60 \pm 0.01$ | 102.1         | 104.0        |
|        | 5.0                                       |         | $4.98 \pm 0.07$                                                       | $5.02 \pm 0.11$ | 99.7          | 100.4        |
| t-test | Mean                                      |         | 2.753                                                                 | 2.784           |               |              |
|        | Variance                                  |         | 2.595                                                                 | 2.696           |               |              |
|        | df                                        |         | 17                                                                    |                 |               |              |
|        | t Stat                                    |         | -0.906                                                                |                 |               |              |
|        | P(T<=t) two-tail                          |         | 0.378                                                                 |                 |               |              |
|        | t Critical two-tail                       |         | 2.110                                                                 |                 |               |              |
